# Supplementary material
Source: ML conference proceedings conference paper supplement (https://openaccess.thecvf.com/content/CVPR_2020/html/Fang_GraspNet-1Billion_A_Large-Scale_CVPR_2020_paper.html)
Supplement: Supplementary file 1 [file Fang_GraspNet-1Billion_A_Large-Scale_CVPR_2020_supplemental.pdf]

# Supplementary file for “GraspNet-1Billion: A Large-Scale Benchmark for General Object Grasping”

Hao-Shu Fang, Chenxi Wang, Minghao Gou, Cewu Lu<sup>1</sup>  
Shanghai Jiao Tong University

fhaoshu@gmail.com, {wcx1997, gmh2015, lucewu}@sjtu.edu.cn

## 1. Data Collection

We provide the detailed settings of our data collection process in Figure 1. (a) Both the RealSense and Kinect camera are fixed on the end link of a robot arm. (b) 256 data collection points are sampled from a quarter sphere.

## 2. Grasp Pose NMS

For two grasps  $\mathbf{G}_1$  and  $\mathbf{G}_2$ , we define grasp pose distance  $D(\mathbf{G}_1, \mathbf{G}_2)$  as a tuple:

$$D(\mathbf{G}_1, \mathbf{G}_2) = (d_t(\mathbf{G}_1, \mathbf{G}_2), d_\alpha(\mathbf{G}_1, \mathbf{G}_2)), \quad (1)$$

where  $d_t(\mathbf{G}_1, \mathbf{G}_2)$  and  $d_\alpha(\mathbf{G}_1, \mathbf{G}_2)$  denote translation distance and rotation distance of two grasps respectively. Let a grasp pose  $\mathbf{G}$  be denoted by a translation vector  $\mathbf{t}$  and a rotation matrix  $\mathbf{R}$ , then  $d_t(\cdot)$  and  $d_\alpha(\cdot)$  is defined as:

$$\begin{aligned} d_t(\mathbf{G}_1, \mathbf{G}_2) &= \|\mathbf{t}_1 - \mathbf{t}_2\|, \\ d_\alpha(\mathbf{G}_1, \mathbf{G}_2) &= \arccos \frac{1}{2}(\text{tr}(\mathbf{R}_1 \cdot \mathbf{R}_2^T) - 1), \end{aligned} \quad (2)$$

where  $\text{tr}(\mathbf{M})$  denotes the trace of matrix  $\mathbf{M}$ .

Since translation and rotation are not in the same metric space, we define the NMS threshold as a tuple too. Let  $TH = (th_d, th_\alpha)$ , we say  $D(\mathbf{G}_1, \mathbf{G}_2) < TH$  if and only if

$$d_t(\mathbf{G}_1, \mathbf{G}_2) < th_d, \quad d_\alpha(\mathbf{G}_1, \mathbf{G}_2) < th_\alpha. \quad (3)$$

Based on the tuple metric, two grasps are merged when their distance is lower than  $TH$ . Meanwhile, only the top  $K$  grasps from each object are considered according to confidence scores and other grasps are omitted. In evaluation, we set  $th_d = 3$  cm,  $th_\alpha = 15$  degree and  $K = 10$ .

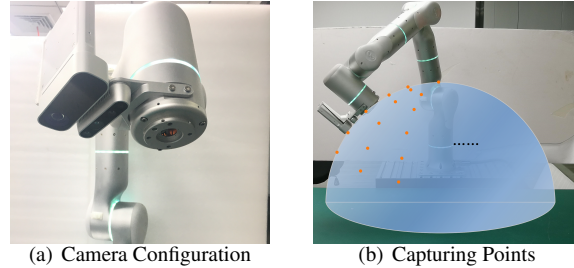

Figure 1. The setting of data collection.
